# Supplementary material for: Adaptation of the Spore Discharge Mechanism in the Basidiomycota
Source: PubMed Central journal article supplement (PMC2612744; doi:10.1371/journal.pone.0004163), 2009-01-08

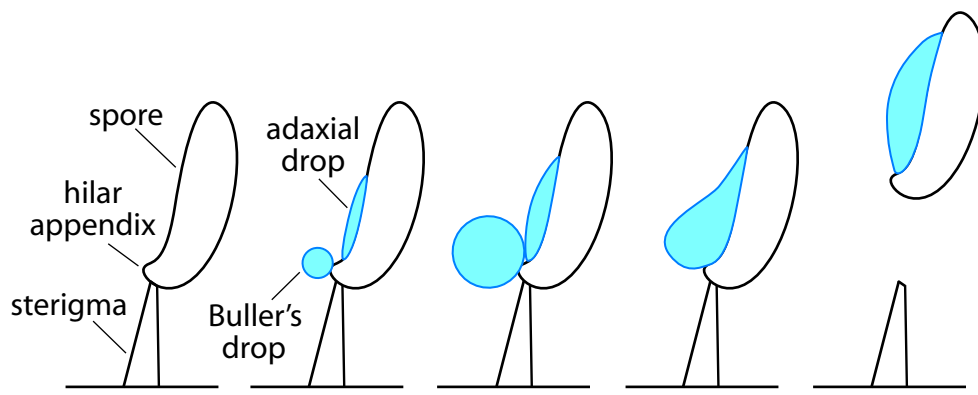

Supplement: pone.0004163.s001.pdf [file pone.0004163.s001.pdf]
